# Supplementary material for: Identification, expression and variation of the GNPDA2 gene, and its association with body weight and fatness traits in chicken
Source: PeerJ journal article supplement (doi:10.7717/peerj.2129), 2016-06-15
Supplement: Fig_S1.pdf [file Fig_S1.pdf]

Percent Identity

|            | 1  | 2    | 3    | 4    | 5    | 6    | 7     | 8    | 9    | 10   | 11   | 12   | 13   | 14   | 15    | 16   | 17    | 18   |      |    |             |
|------------|----|------|------|------|------|------|-------|------|------|------|------|------|------|------|-------|------|-------|------|------|----|-------------|
| Divergence | 1  | █    | 95.6 | 99.6 | 96.0 | 93.5 | 100.0 | 98.9 | 97.8 | 97.1 | 96.0 | 99.3 | 96.0 | 96.7 | 100.0 | 96.0 | 95.6  | 96.4 | 86.6 | 1  | Cattle      |
|            | 2  | 4.5  | █    | 96.0 | 99.3 | 91.3 | 95.6  | 96.0 | 94.5 | 93.8 | 98.5 | 96.0 | 98.5 | 93.8 | 95.6  | 98.5 | 100.0 | 98.9 | 85.8 | 2  | Chicke      |
|            | 3  | 0.4  | 4.1  | █    | 96.4 | 93.5 | 99.6  | 99.3 | 98.2 | 97.5 | 96.4 | 99.6 | 96.4 | 97.1 | 99.6  | 96.4 | 96.0  | 96.7 | 87.0 | 3  | Dog         |
|            | 4  | 4.1  | 0.7  | 3.7  | █    | 91.6 | 96.0  | 96.4 | 94.9 | 94.2 | 99.3 | 96.4 | 99.3 | 94.2 | 96.0  | 99.3 | 99.3  | 99.6 | 86.2 | 4  | Duck        |
|            | 5  | 6.9  | 9.3  | 6.9  | 8.9  | █    | 93.5  | 93.5 | 93.1 | 92.4 | 92.0 | 93.5 | 91.6 | 92.7 | 93.5  | 91.6 | 91.3  | 92.0 | 88.0 | 5  | Frog        |
|            | 6  | 0.0  | 4.5  | 0.4  | 4.1  | 6.9  | █     | 98.9 | 97.8 | 97.1 | 96.0 | 99.3 | 96.0 | 96.7 | 100.0 | 96.0 | 95.6  | 96.4 | 86.6 | 6  | Goat        |
|            | 7  | 1.1  | 4.1  | 0.7  | 3.7  | 6.9  | 1.1   | █    | 98.2 | 97.5 | 96.4 | 99.6 | 96.4 | 97.5 | 98.9  | 96.4 | 96.0  | 96.7 | 87.0 | 7  | Horse       |
|            | 8  | 2.2  | 5.7  | 1.8  | 5.3  | 7.3  | 2.2   | 1.8  | █    | 97.1 | 94.9 | 98.6 | 94.9 | 97.1 | 97.8  | 94.9 | 94.5  | 95.3 | 87.0 | 8  | Human       |
|            | 9  | 3.0  | 6.5  | 2.6  | 6.1  | 8.1  | 3.0   | 2.6  | 3.0  | █    | 94.5 | 97.8 | 94.2 | 98.9 | 97.1  | 94.2 | 93.8  | 94.5 | 85.9 | 9  | Mouse       |
|            | 10 | 4.1  | 1.5  | 3.7  | 0.7  | 8.5  | 4.1   | 3.7  | 5.3  | 5.7  | █    | 96.4 | 99.3 | 94.5 | 96.0  | 99.3 | 98.5  | 99.6 | 86.5 | 10 | Parrot      |
|            | 11 | 0.7  | 4.1  | 0.4  | 3.7  | 6.9  | 0.7   | 0.4  | 1.5  | 2.2  | 3.7  | █    | 96.4 | 97.5 | 99.3  | 96.4 | 96.0  | 96.7 | 87.0 | 11 | Pig         |
|            | 12 | 4.1  | 1.5  | 3.7  | 0.7  | 8.9  | 4.1   | 3.7  | 5.3  | 6.1  | 0.7  | 3.7  | █    | 94.2 | 96.0  | 99.3 | 98.5  | 99.6 | 86.2 | 12 | Pigeon      |
|            | 13 | 3.3  | 6.5  | 3.0  | 6.1  | 7.7  | 3.3   | 2.6  | 3.0  | 1.1  | 5.7  | 2.6  | 6.1  | █    | 96.7  | 94.2 | 93.8  | 94.5 | 86.2 | 13 | Rat         |
|            | 14 | 0.0  | 4.5  | 0.4  | 4.1  | 6.9  | 0.0   | 1.1  | 2.2  | 3.0  | 4.1  | 0.7  | 4.1  | 3.3  | █     | 96.0 | 95.6  | 96.4 | 86.6 | 14 | Sheep       |
|            | 15 | 4.1  | 1.5  | 3.7  | 0.7  | 8.9  | 4.1   | 3.7  | 5.3  | 6.1  | 0.7  | 3.7  | 0.7  | 6.1  | 4.1   | █    | 98.5  | 99.6 | 86.9 | 15 | Sparrow     |
|            | 16 | 4.5  | 0.0  | 4.1  | 0.7  | 9.3  | 4.5   | 4.1  | 5.7  | 6.5  | 1.5  | 4.1  | 1.5  | 6.5  | 4.5   | 1.5  | █     | 98.9 | 85.8 | 16 | Turkey      |
|            | 17 | 3.7  | 1.1  | 3.3  | 0.4  | 8.5  | 3.7   | 3.3  | 4.9  | 5.7  | 0.4  | 3.3  | 0.4  | 5.7  | 3.7   | 0.4  | 1.1   | █    | 86.5 | 17 | Zebra finch |
|            | 18 | 14.8 | 15.8 | 14.4 | 15.3 | 13.1 | 14.8  | 14.4 | 14.4 | 15.7 | 14.9 | 14.4 | 15.3 | 15.3 | 14.8  | 14.4 | 15.8  | 14.9 | █    | 18 | Zebrafish   |
|            | 1  | 2    | 3    | 4    | 5    | 6    | 7     | 8    | 9    | 10   | 11   | 12   | 13   | 14   | 15    | 16   | 17    | 18   |      |    |             |

A

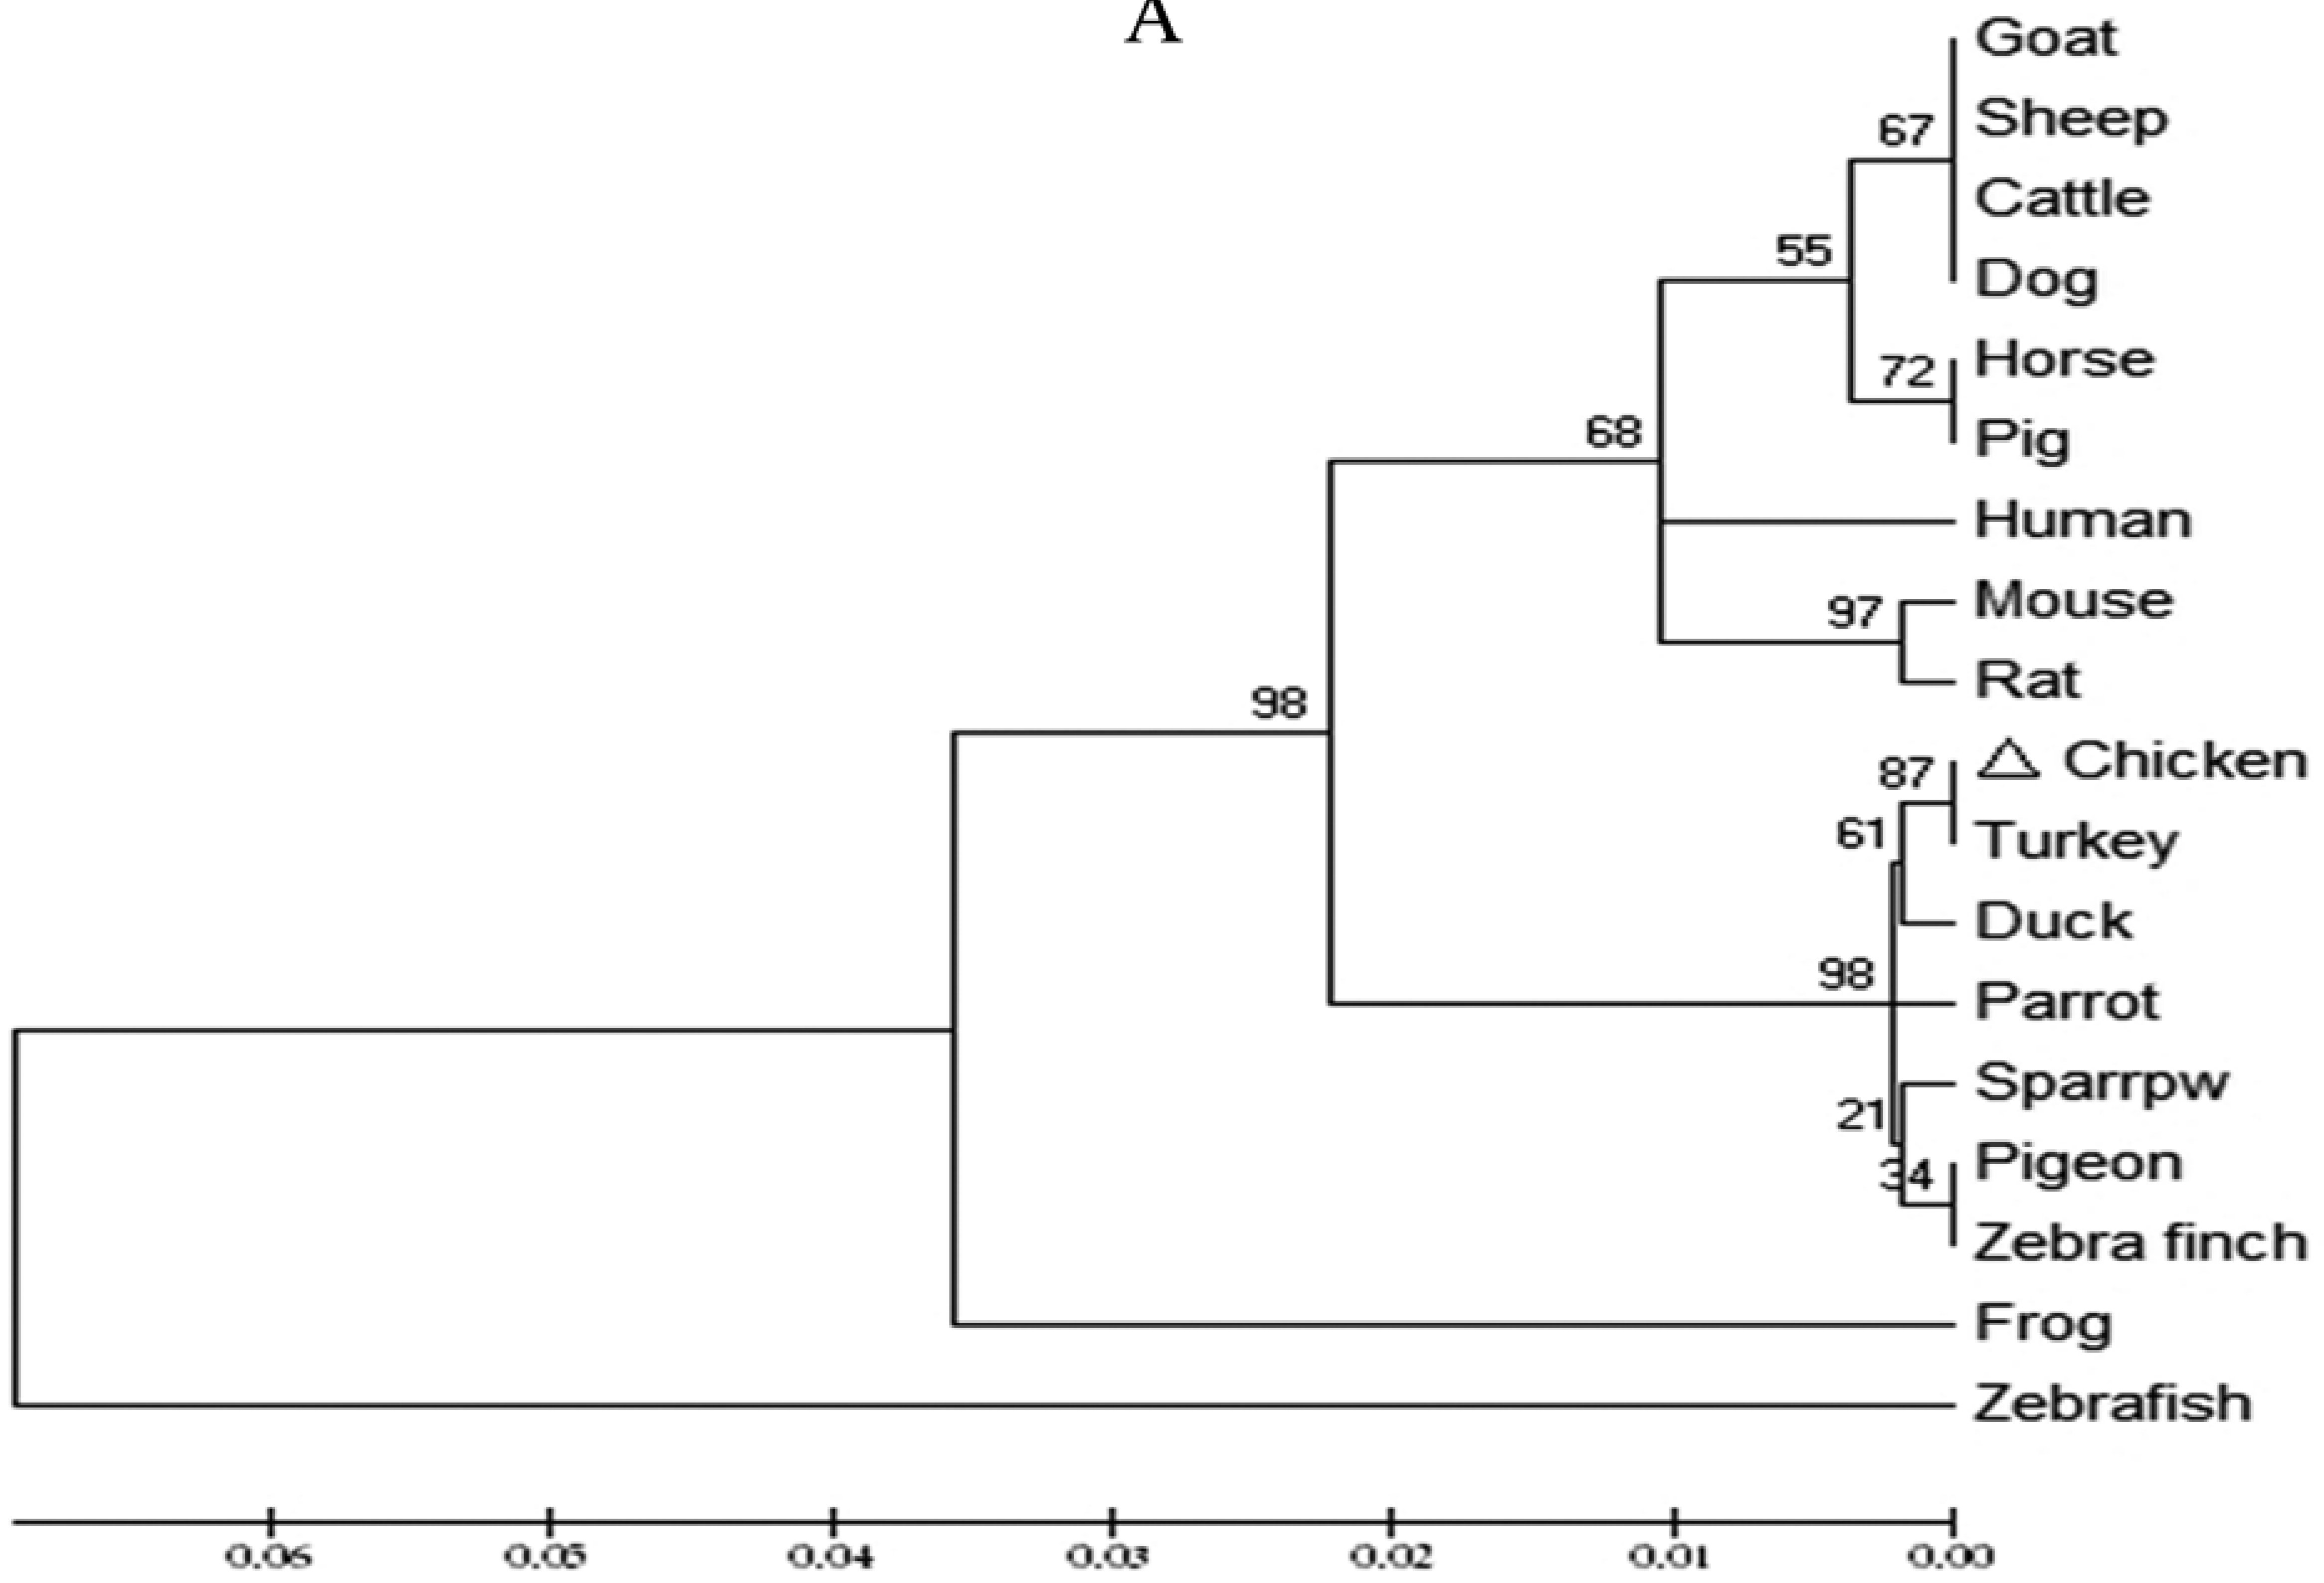

B
